# Supplementary material for: Comparison of linear and volumetric criteria for the determination of therapeutic response in dogs with intracranial gliomas
Source: PubMed Central journal article supplement — J Vet Intern Med. 2022 Mar 11;36(3):1066–74. doi: 10.1111/jvim.16406 (PMC9151452; doi:10.1111/jvim.16406), 2022-03-11
Supplement: JVIM-36-1066-s001.pdf [file JVIM-36-1066-s001.pdf]

**Table S1- Minimum Sequences and Parameters Used for Brain MR Imaging (1.5T)**

| Sequence Name                        | TR (ms)  | TE (ms) | FA (°)  | FOV (mm) | Matrix | Voxel (mm)       | Slice Thk (mm) | Gap (%) | Notes                 |
|--------------------------------------|----------|---------|---------|----------|--------|------------------|----------------|---------|-----------------------|
| <b>2D T2W Sag TSE</b>                | >2500    | 100-120 | 90/≥160 | ≤150     | ≥256   | 0.58 X 0.58 X 3  | 3              | 10      |                       |
| <b>2D T2w Trans TSE</b>              | >2500    | 100-120 | 90/≥160 | ≤150     | ≥256   | 0.58 X 0.58 X 3  | 3              | 10      |                       |
| <b>3D T1W IR-GRE</b>                 | 5-25     | 2.4-4.5 | 10-20   | ≤150     | ≥150   | 1 mm isotropic   | 1              | 0       | TI = 400-450 ms       |
| <b>2D T2*W Trans GRE</b>             | 500-1050 | 16-26   | 18-20   | ≤150     | ≥256   | 0.58 X 0.58 X 3  | 3              | 10      |                       |
| <b>2D T2W FLAIR TSE</b>              | >6000    | 92-140  | 90/≥160 | ≤150     | ≥256   | 0.58 X 0.58 X 3  | 3              | 10      | TI =2000-2800 ms      |
| <b>2D DWI SS-EPI Inject contrast</b> | >5000    | minimal | 90/180  | ≤150     | 128    | 1.2 X 1.2 X 4    | ≤4             | 0       | b value of 0 and 1000 |
| <b>3D T1w IR-GRE +C</b>              | 5-25     | 2.4-4.5 | 10-20   | ≤150     | ≥150   | ≤ 1 mm isotropic | 1              | 0       | TI = 400-450 ms       |

Table S1 Key: TR- time of repetition; ms- milliseconds; TE- time of echo; FA- flip angle; FOV- field-of-view; Slice thk- slice thickness; Gap- interslice gap;

2D- two dimensional; T2W- T2-weighted; Sag- sagittal; TSE- turbo spin echo; 3D- three dimensional; T1W- T1-weighted, IR- inversion recovery; GRE- gradient recalled echo, TI- time of inversion; T2\*W- T2\*-weighted, FLAIR- fluid attenuated inversion recovery, DWI- diffusion weighted imaging; SS-EPI- single shot echo planar imaging; +C- post contrast medium administration. Adapted from Packer et. al., 2018.<sup>7</sup>

**Table S2- Summary of Linear and Volumetric Criteria Used to Assign Therapeutic Responses in Canine Gliomas**

|                                                                                                                                             | <b>RECIST (1D)</b>                                              | <b>RAVNO (2D)</b>                                                                                                                                                                                                                            | <b>Total T2W Tumor Volume (TTV)</b>                                                                                 | <b>Contrast Enhancing Tumor Volume (CEV)</b>                                                                    |
|---------------------------------------------------------------------------------------------------------------------------------------------|-----------------------------------------------------------------|----------------------------------------------------------------------------------------------------------------------------------------------------------------------------------------------------------------------------------------------|---------------------------------------------------------------------------------------------------------------------|-----------------------------------------------------------------------------------------------------------------|
| <b>Complete Response (CR)</b> <ul style="list-style-type: none"> <li><b>Imaging criteria</b></li> <li><b>Clinical criteria</b></li> </ul>   | <p>Elimination of all enhancing tumor</p> <p>Not applicable</p> | <p>Elimination of all enhancing tumor; Stable or decreased T2/FLAIR lesion burden; No new lesions</p> <p>Stable or improved clinical status; Dog not receiving steroids; All of the above required for CR</p>                                | <p>Elimination of entire T2W tumor burden</p> <p>Stable or improved clinical status; Dog not receiving steroids</p> | <p>Elimination of all enhancing tumor</p> <p>Stable or improved clinical status; Dog not receiving steroids</p> |
| <b>Partial Response (PR)</b> <ul style="list-style-type: none"> <li><b>Imaging criteria</b></li> <li><b>Clinical criteria</b></li> </ul>    | <p>≥30% decrease in LD</p> <p>Not applicable</p>                | <p>&gt;50% decrease in enhancing tumor SPD; Stable or decreased T2/FLAIR lesion burden; No new lesions</p> <p>Stable or improved clinical status; Stable or decreased steroid dose; All of the above required for PR</p>                     | <p>≥65% decrease in TTV</p> <p>Stable or improved clinical status; Stable or decreased steroid dose</p>             | <p>≥65% decrease in CEV</p> <p>Stable or improved clinical status; Stable or decreased steroid dose</p>         |
| <b>Stable Disease (SD)</b> <ul style="list-style-type: none"> <li><b>Imaging criteria</b></li> <li><b>Clinical criteria</b></li> </ul>      | <p>All other findings</p> <p>Not applicable</p>                 | <p>&lt;50% decrease or &lt;25% increase in enhancing tumor SPD; Stable or decreased T2/FLAIR lesion burden; No new lesions</p> <p>Stable or improved clinical status; Stable or decreased steroid dose; All of the above required for SD</p> | <p>All other findings</p> <p>Stable or improved clinical status; Stable or decreased steroid dose</p>               | <p>All other findings</p> <p>Stable or improved clinical status; Stable or decreased steroid dose</p>           |
| <b>Progressive Disease (PD)</b> <ul style="list-style-type: none"> <li><b>Imaging criteria</b></li> <li><b>Clinical criteria</b></li> </ul> | <p>≥20% increase in LD</p> <p>Not applicable</p>                | <p>&gt;25% increase in enhancing SPD; Increased T2/FLAIR lesion burden; New lesion(s) present</p> <p>Clinical deterioration; Any of the above qualifies as PD</p>                                                                            | <p>≥40% increase in TTV</p> <p>Clinical deterioration</p>                                                           | <p>≥40% increase in CEV</p> <p>Clinical deterioration</p>                                                       |

**Table S3- Tumor Measurement Efficiency by Rater, Method, and Batch**

|                         | <b>1D<br/>RECIST</b> | <b>2D<br/>RAVNO</b> | <b>TTV</b>  | <b>CEV</b>   |
|-------------------------|----------------------|---------------------|-------------|--------------|
| <b>Rater 1, Batch 1</b> | 2.04 (.59)           | 6.08 (1.52)         | 5.22 (1.23) | 10.24 (1.9)  |
| <b>Rater 1, Batch 2</b> | 1.72 (.6)            | 6.92 (1.74)         | 5.80 (1.2)  | 9.56 (1.63)  |
| <b>Rater 2, Batch 1</b> | 3.24 (.58)           | 7.88 (1.84)         | 7.92 (1.38) | 17.80 (3.65) |
| <b>Rater 2, Batch 2</b> | 2.72 (.66)           | 7.84 (1.73)         | 7.36 (1.57) | 15.84 (3.06) |
| <b>Rater 3, Batch 1</b> | 3.28 (.77)           | 8.6 (1.44)          | 8.4 (1.32)  | 25.36 (5.61) |
| <b>Rater 3, Batch 2</b> | 2.64 (.62)           | 6.56 (1.69)         | 5.84 (1.41) | 16.64 (3.17) |

Data presented as mean (SD) of measurement time in minutes; n=25 MRI analyzed/batch

**Figure S1**

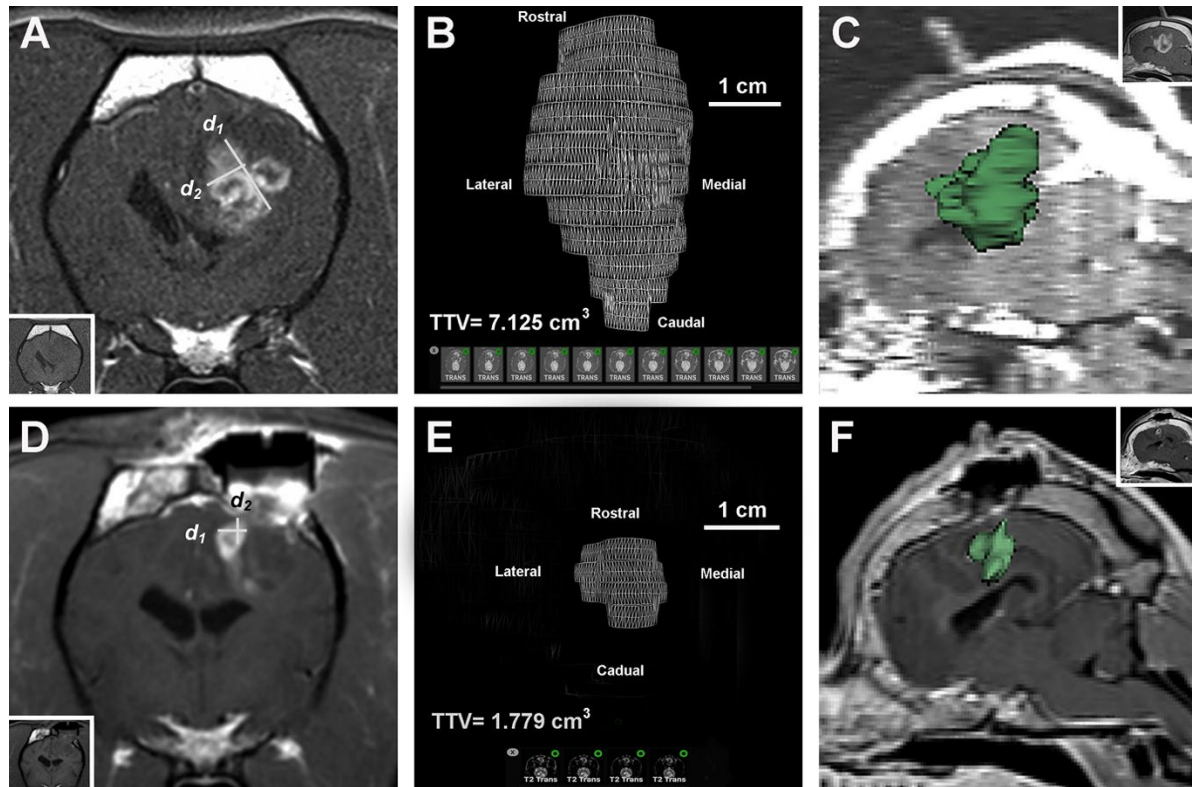

**Figure S1 Legend-** Partial response (PR) determined in a dog with a contrast-enhancing astrocytoma. Compared to baseline measurements (A-C), a reduction in tumor size meeting criteria for PR is evident on the followup scan (D-F) using 1D RECIST ( $d_1$ ; A, D) 2D RAVNO ( $d_1 \times d_2$ ; A, D), dorsal planar reconstructed total tumor volume (TTV; B, E), and contrast-enhancing volume (CEV [green]; C, F) measurements. Insets of A and D are pre-contrast T1W images and are T1W post-contrast images in C and F.

**Figure S2**

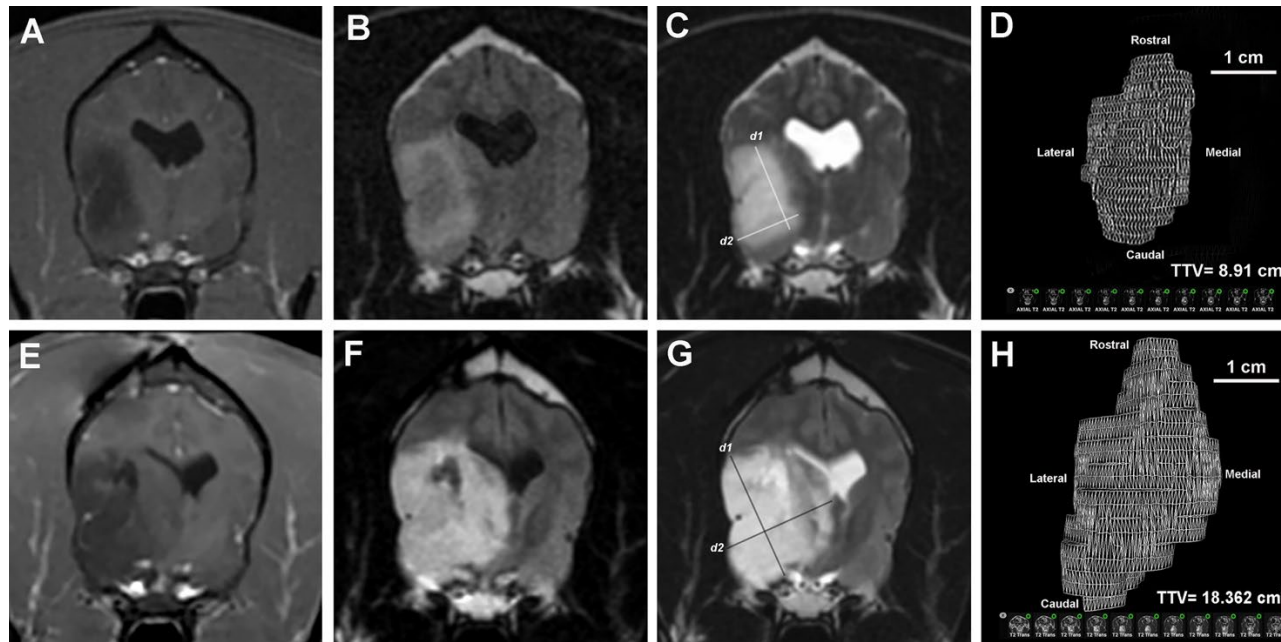

**Figure S2 Legend-** Progressive disease (PD) with quantitative measurements obtained from T2-weighted (T2W) images in a dog with a non-enhancing, high-grade oligodendroglioma. Compared to the tumor nadir measurements (A-D), an unequivocal increase in tumor size meeting criteria for PD is evident on the followup scan (E-H) using 1D RECIST ( $d1$ ; C, G), 2D RAVNO ( $d1 \times d2$ ; C, G), and dorsal planar reconstructed total tumor volume (TTV; D, H) measurements. Qualitative evaluations included review of T1-weighted post-contrast images (A, E), fluid attenuated inversion recovery images (B, F), and T2W images (C, G).
